# Supplementary material
Source: Research Square preprint supplement (doi:10.21203/rs.3.rs-9241783/v1)
Supplement: Supplementary file 1 [file f7bdb8ce055e22a715865c0a.docx]

**Supporting Information**

**A novel approach for significantly increasing cassava resistant starch (RS3) yields by using mechanical activation combined with enzymatic hydrolysis**

Zexiong Huanga,#, Tianyi Guoa,#, Xiaohua Huanga, Chen Lianga, Mingyu Chenb, Yanjuan Zhanga, Zuqiang Huanga, Huayu Hua,*, Tao Gana,[[1]](#footnote-0)*

a *School of Chemistry and Chemical Engineering, Guangxi University, Nanning 510004, China*

b *State Key Laboratory of Non-Food Biomass Energy Technology, Guangxi State Farm Mingyang Biochemical Co., Ltd., Nanning 530226, China*


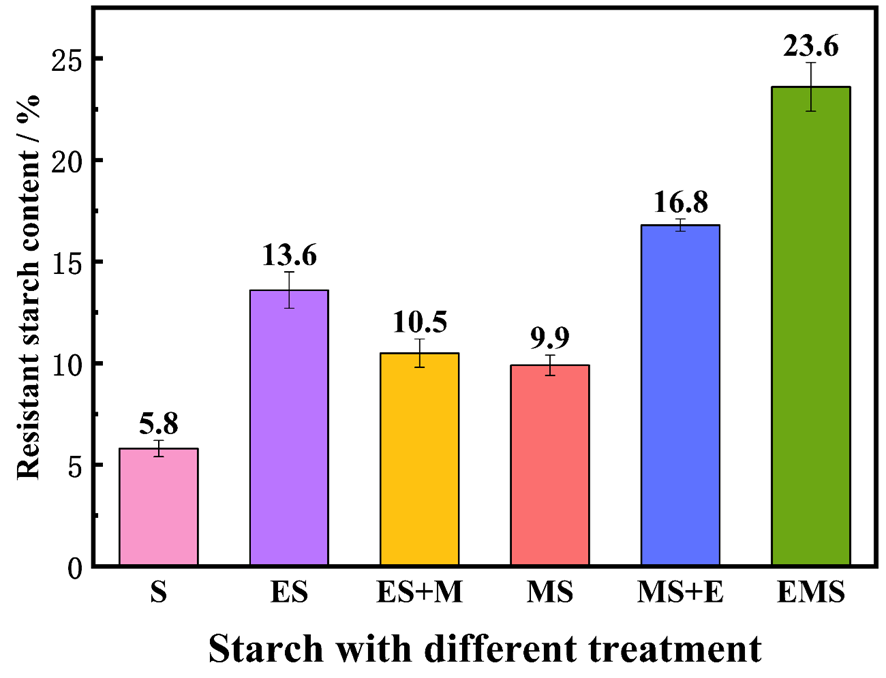


**Figure 1.** RS content under different treatment conditions.

**Table S1** Representative examples of resistant starch.

| Treatment | Material | Initial RS content(%) | Final RS content(%) | Reference |
| --- | --- | --- | --- | --- |
| MA | Cassava starch | 3.8 | 13.5 | [1] |
| Pullulanase treatment | Waxy maize starch | 13.0 | 19.0 | [2] |
| High-solid method | High-amylose maize starch | 36.7 | 51.4 | [3] |
| Autoclaving and pullulanase | Sweet potato starch | 1.4 | 15.9 | [4] |
| Microwave-toughening treatment | Potato starch | 11.5 | 27.1 | [5] |
| MA combined with enzymatic hydrolysis | Cassava starch | 5.8 | 23.6 | This work |

**Table S2** LF-NMR relaxation spectrum parameters for starch-water system of different samples.

| Samples | Time of relaxation (ms) | |  | Normalized peak area | |
| --- | --- | --- | --- | --- | --- |
| T21/b | T22 |  | A21 | A22 |
| S | 1.92 | 42.78 |  | 20.59 | 153.28 |
| ES | 0.74 | 25.77 |  | 32.17 | 219.87 |
| ES-M | 0.84 | 15.52 |  | 21.92 | 196.01 |
| MS | 1.08 | 33.21 |  | 31.63 | 222.11 |
| MS-E | 0.71 | 12.83 |  | 22.58 | 234.33 |
| EMS | 0.69 | 18.77 |  | 35.84 | 262.06 |

**Table S3** Thermal properties of different starch samples.

| Samples | *T*0 (°C) | *T*p (°C) | *T*c (°C) | Δ*H* (J/g) |
| --- | --- | --- | --- | --- |
| S | 60.32 | 66.31 | 71.96 | 7.38 |
| ES | 63.35 | 70.83 | 76.98 | 11.48 |
| ES+M | 62.48 | 69.46 | 75.44 | 10.20 |
| MS | 61.17 | 66.81 | 73.12 | 12.22 |
| MS+E | 67.12 | 70.11 | 77.76 | 13.26 |
| EMS | 71.02 | 78.41 | 94.47 | 16.47 |

**Table S4** Representative examples of resistant starch foods.

| Reference | Material | RS type | RS content(%) | GI |
| --- | --- | --- | --- | --- |
| [6] | Cowpea starch | RS3 | 43.15±1.09 | 43.50±0.03 |
| [7] | Potato starch | RS4 | 29.02±0.80 | 58.60±0.99 |
| [8] | Rice flour | RS3 RS5 | 10.39±0.37 | 93.36±0.35 |
| [9] | Rice flour | RS3 | 16.41±0.09 | 66.98±2.68 |
| This work | Cassava starch | RS3 | 23.61±0.91 | 53.29±1.05 |

**References**

[1] Liu, R., Sun, W., Zhang, Y., Huang, Z., Hu, H., Zhao, M., ... Li, W. (2019). Development of a novel model dough based on mechanically activated cassava starch and gluten protein: Application in bread. *Food Chem.*, 300, 125196. DOI: 10.1016/j.foodchem.2019.125196

[2] Liu, W., Hong, Y., Gu, Z., Cheng, L., Li, Z., & Li, C. (2016). In structure and in-vitro digestibility of waxy corn starch debranched by pullulanase. *Food Hydrocolloids*, 67(JUN.), 104-110. DOI: 10.1016/j.foodhyd.2016.12.036

[3] Li, W., Zhou, Z., Fan, S., Cai, X., Chen, J., Zhang, Y., ... Liang, J. (2021). Formation of type 3 resistant starch from mechanical activation-damaged high-amylose maize starch by a high-solid method. *Food Chem.*, 363, 130344. DOI: 10.1016/j.foodchem.2021.130344

[4] Sun, H., Fan, J., Tian, Z., Ma, L., Meng, Y., Yang, Z., ... Nan, X. (2022). Effects of treatment methods on the formation of resistant starch in purple sweet potato. *Food Chem.*, 367, 130580. DOI: 10.1016/j.foodchem.2021.130580

[5] Li, Y., Xu, T., Xiao, J., Zong, A., Qiu, B., Jia, M., ... Liu, W. (2018). Efficacy of potato resistant starch prepared by microwave–toughening treatment. *Carbohyd. Polym.*, 192, 299-307. DOI: 10.1016/j.carbpol.2018.03.076

[6] Khongsak, Srikaeo, Janya, & Sangkhiaw. (2014). Effects of amylose and resistant starch on glycaemic index of rice noodles. *Lwt Food Sci. Technol*., 59, (2), 1129-1135. DOI: 10.1016/j.lwt.2014.06.012

[7] Ratnaningsih, N., Suparmo, Harmayani, E., & Marsono, Y. (2020). Physicochemical properties, in vitro starch digestibility, and estimated glycemic index of resistant starch from cowpea (Vigna unguiculata) starch by autoclaving-cooling cycles. *Int. J. Biol. Macromol.*, 142, 191-200. DOI: 10.1016/j.ijbiomac.2019.09.092

[8] Remya, R., Jyothi, A. N., & Sreekumar, J. (2017). Comparative study of RS4 type resistant starches derived from cassava and potato starches via octenyl succinylation. *Starch ‐ Strke*, 1600264. DOI: 10.1002/star.201600264

[9] Yun, P., Devahastin, S., & Chiewchan, N. (2020). In vitro glycemic index, physicochemical properties and sensory characteristics of white bread incorporated with resistant starch powder prepared by a novel spray-drying based method. *J. Food Eng.*, 294. DOI: 10.1016/j.jfoodeng.2020.110438

1. *Corresponding authors.

   Telephone: *+86-771-3233718*

   Fax: *+86-771-3233718*

   E-mail addresses: *gant@gxu.edu.cn (T. Gan),* *huhuayu@gxu.edu.cn (H. Hu)* [↑](#footnote-ref-0)
